# Supplementary material for: lncRNA H19 facilitates the proliferation and differentiation of human dental pulp stem cells via EZH2-dependent LATS1 methylation
Source: PubMed Central journal article supplement (PMC8339349; doi:10.1016/j.omtn.2021.04.017), 2021-04-24
Supplement: mmc1.pdf [file mmc1.pdf]

OMTN, Volume 25

**Supplemental information**

**lncRNA H19 facilitates the proliferation  
and differentiation of human dental pulp stem  
cells via EZH2-dependent LATS1 methylation**

**Zhen Du, Xiaoming Shi, and Aizhong Guan**

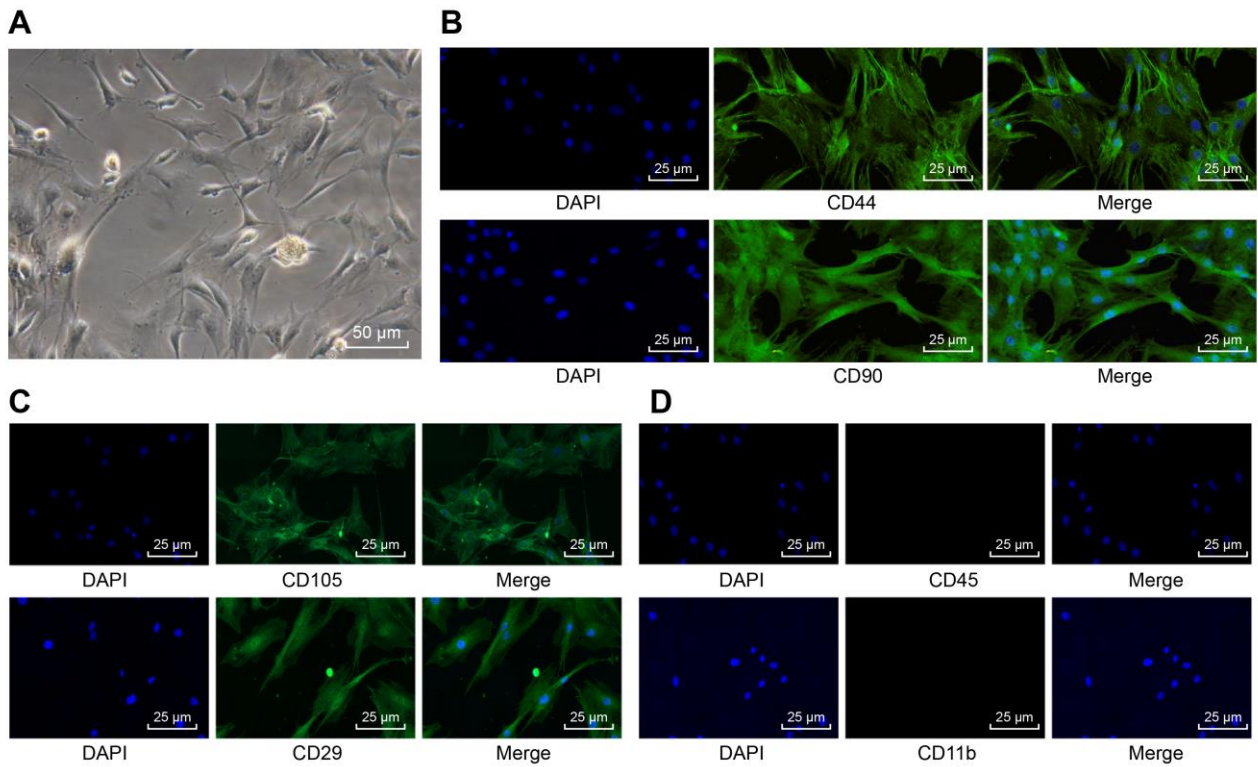

**Figure S1** Successful isolation and culture of hDPSCs. A, morphology of hDPSCs observed under an inverted microscope ( $\times 200$ ). B, expression of hDPSC surface markers (CD44 and CD90) detected by immunofluorescence ( $\times 400$ ). C, expression of hDPSC surface markers (CD105 and CD29) detected by immunofluorescence ( $\times 400$ ). D, expression of hDPSC surface markers (CD45 and CD11b) detected by immunofluorescence ( $\times 400$ ).

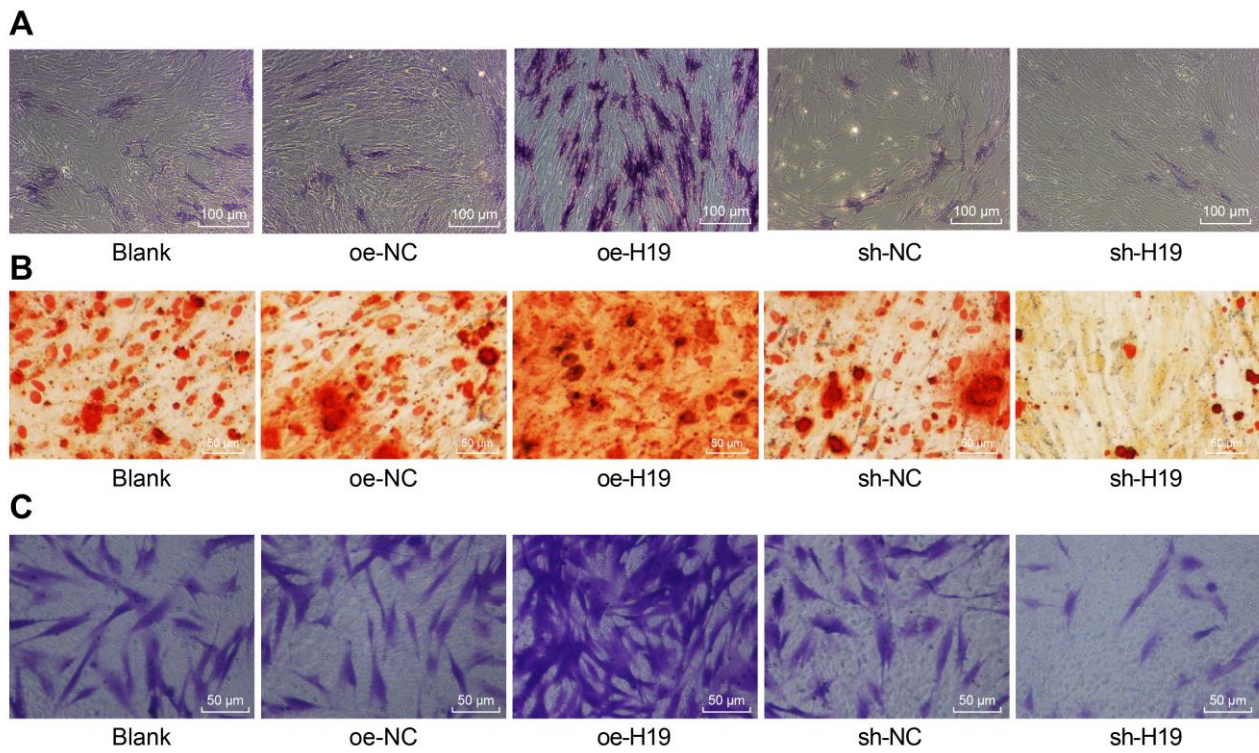

**Figure S2** A, ALP staining detection ( $\times 100$ ). B, the formation of mineralized nodules assessed by Alizarin red staining ( $\times 200$ ). C, cell migration determined by Transwell assay ( $\times 200$ ).

**A**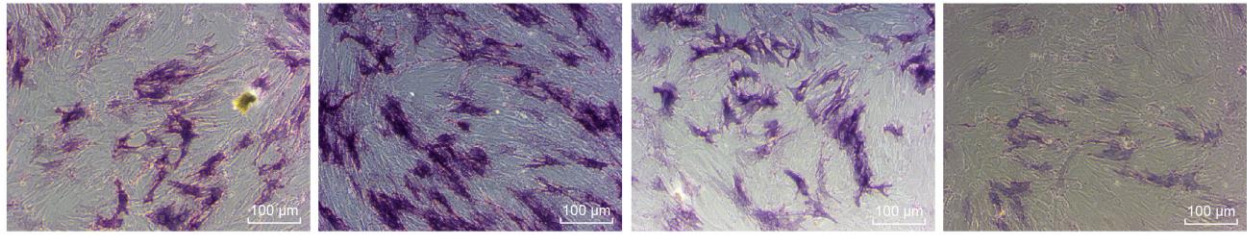

oe-NC

oe-H19

oe-H19 + oe-LATS1

oe-LATS1

**B**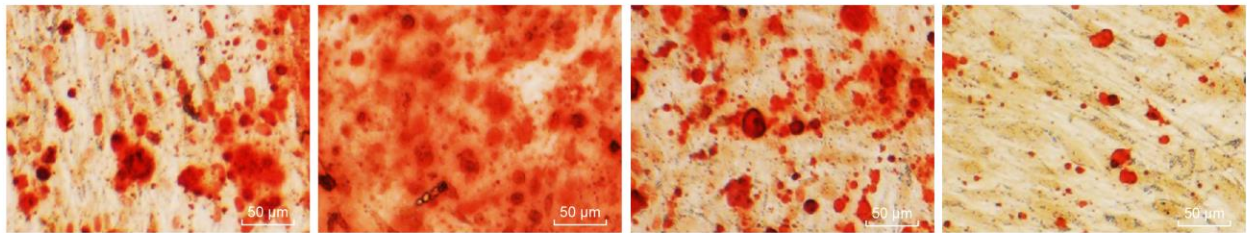

oe-NC

oe-H19

oe-H19 + oe-LATS1

oe-LATS1

**C**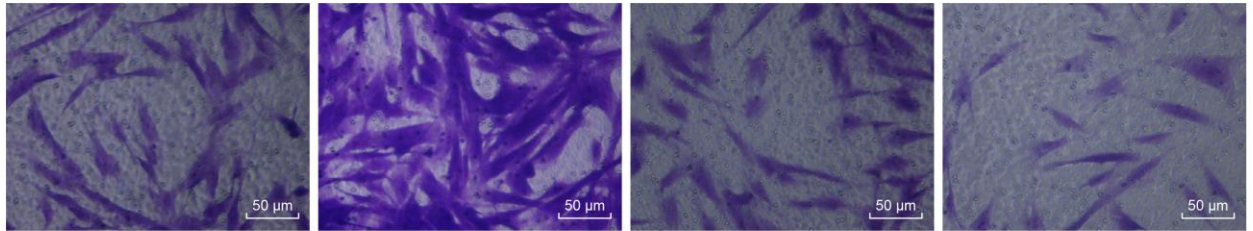

oe-NC

oe-H19

oe-H19 + oe-LATS1

oe-LATS1

**Figure S3** A, ALP staining detection ( $\times 100$ ). B, the formation of mineralized nodules examined by Alizarin red staining ( $\times 200$ ). C, migration of hDPSCs evaluated by Transwell assay ( $\times 200$ ).

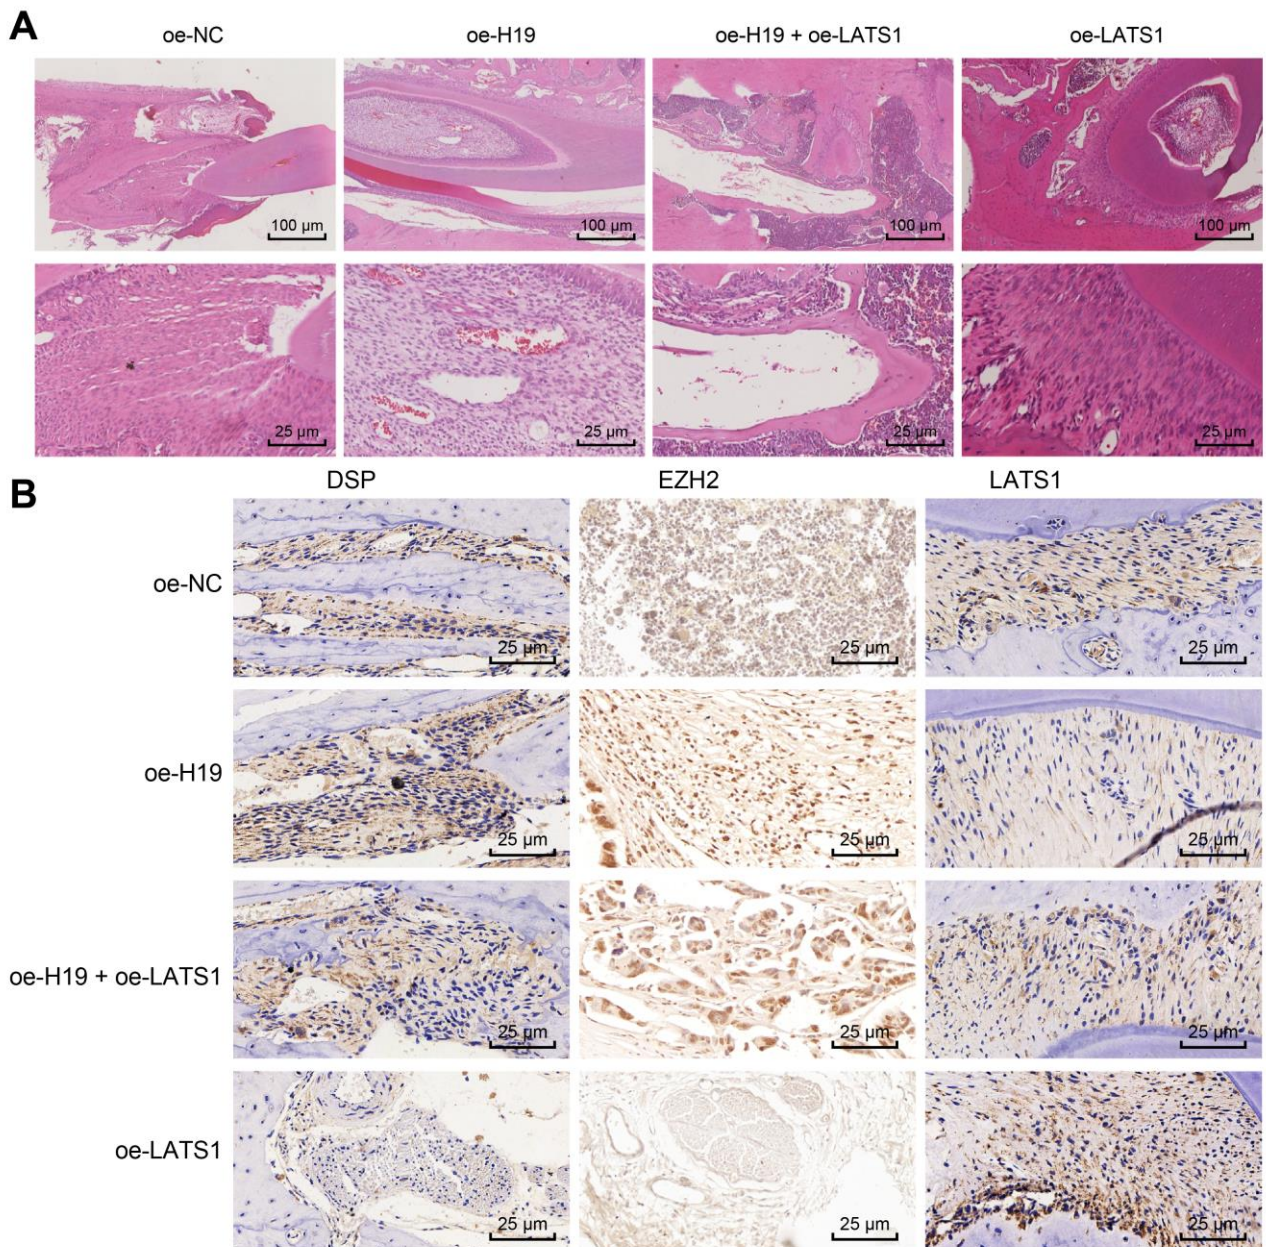

**Figure S4** A, the formation of dentin and dental pulp-like cells assessed by HE staining ( $\times 100$ ). B, the expressions of DSPP, EZH2 and LATS1 in dentin and dental pulp-like tissues evaluated by immunohistochemistry ( $\times 200$ ).

**Table S1** Primer sequences for RT-qPCR

| Gene  | Primer sequence                  |
|-------|----------------------------------|
| H19   | F: 5'-TTCAAAGCCTCCACGACTCT-3'    |
|       | R: 5'-GCTCACACTCACGCACACTC-3'    |
| ALP   | F: 5'-CCACGTCTTCACATTTGGTG-3'    |
|       | R: 5'-AGACTGCGCCTGGTAGTTGT-3'    |
| DMP1  | F: 5'-ACA GCAGCTCAGCAGAGA GT-3'  |
|       | R: 5'-TAATAGCCGTCTTGGCAGTC-3'    |
| OCN   | F: 5'-GGCAGCGAGGTAGTGAAGAG-3'    |
|       | R: 5'-CTGGAGAGGAGCAGAACTGG-3'    |
| DSPP  | F: 5'-GTCGCTGTTGTCCAAGAAGA-3'    |
|       | R: 5'-ATCCTCATCTGCTCCATTCC-3'    |
| LATS1 | F: 5'-CCACCCTACCCAAAACATCTG-3'   |
|       | R: 5'-CGCTGCTGATGAGATTTGAGTAC-3' |
| GAPDH | F: 5'-ATGGAGAAGGCTGGGGCTC-3'     |
|       | R: 5'-AAGTTGTCATGGATGACCTTG-3'   |

Notes: RT-qPCR, reverse transcription quantitative polymerase chain reaction; F, forward; R, reverse; GAPDH, glyceraldehyde-3-phosphate dehydrogenase; ALP, alkaline phosphatase; DMP1, dentin matrix protein 1; OCN, osteocalcin; DSPP, dentin sialophosphoprotein; LATS1, large tumour suppressor 1.
